# Supplementary material for: Palladium-catalyzed conjugate reduction of enones into α,β-dideuterioketones with hexamethyldisilane and deuterium oxide
Source: Royal Society of Chemistry journal article supplement (doi:10.1039/b618107d), 2007-01-01

Date : Tue Feb 14 17:05:26 2006

FileName : LoadingFID.nmdata  
 Comment : 15094\_f  
 SliceHistory : non  
 EXMODE :

POINT 65536 points  
 SAMPO 65536 points  
 FREQU 8000.0 Hz  
 FILTR 4000 Hz  
 DELAY 50.0 usec  
 DEADT 72.3 usec  
 INTVL 125.0 usec  
 TIMES 16 times  
 DUMMY 0 times  
 PD 1.0000 sec  
 ACGTM 8192.0000 msec  
 PREDL 0.01000 msec  
 INIWT 1000.0000 msec  
 RESOL 0.12 Hz  
 PW1 5.50 usec  
 OBNUC 1H  
 OBFRQ 499.10 MHz  
 OBSET 128885.00 Hz  
 RGAIN 24  
 SCANS 16 times  
 SLVNT CDCL3  
 SPINNING 14 Hz  
 TEMP 23.5 C

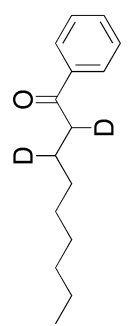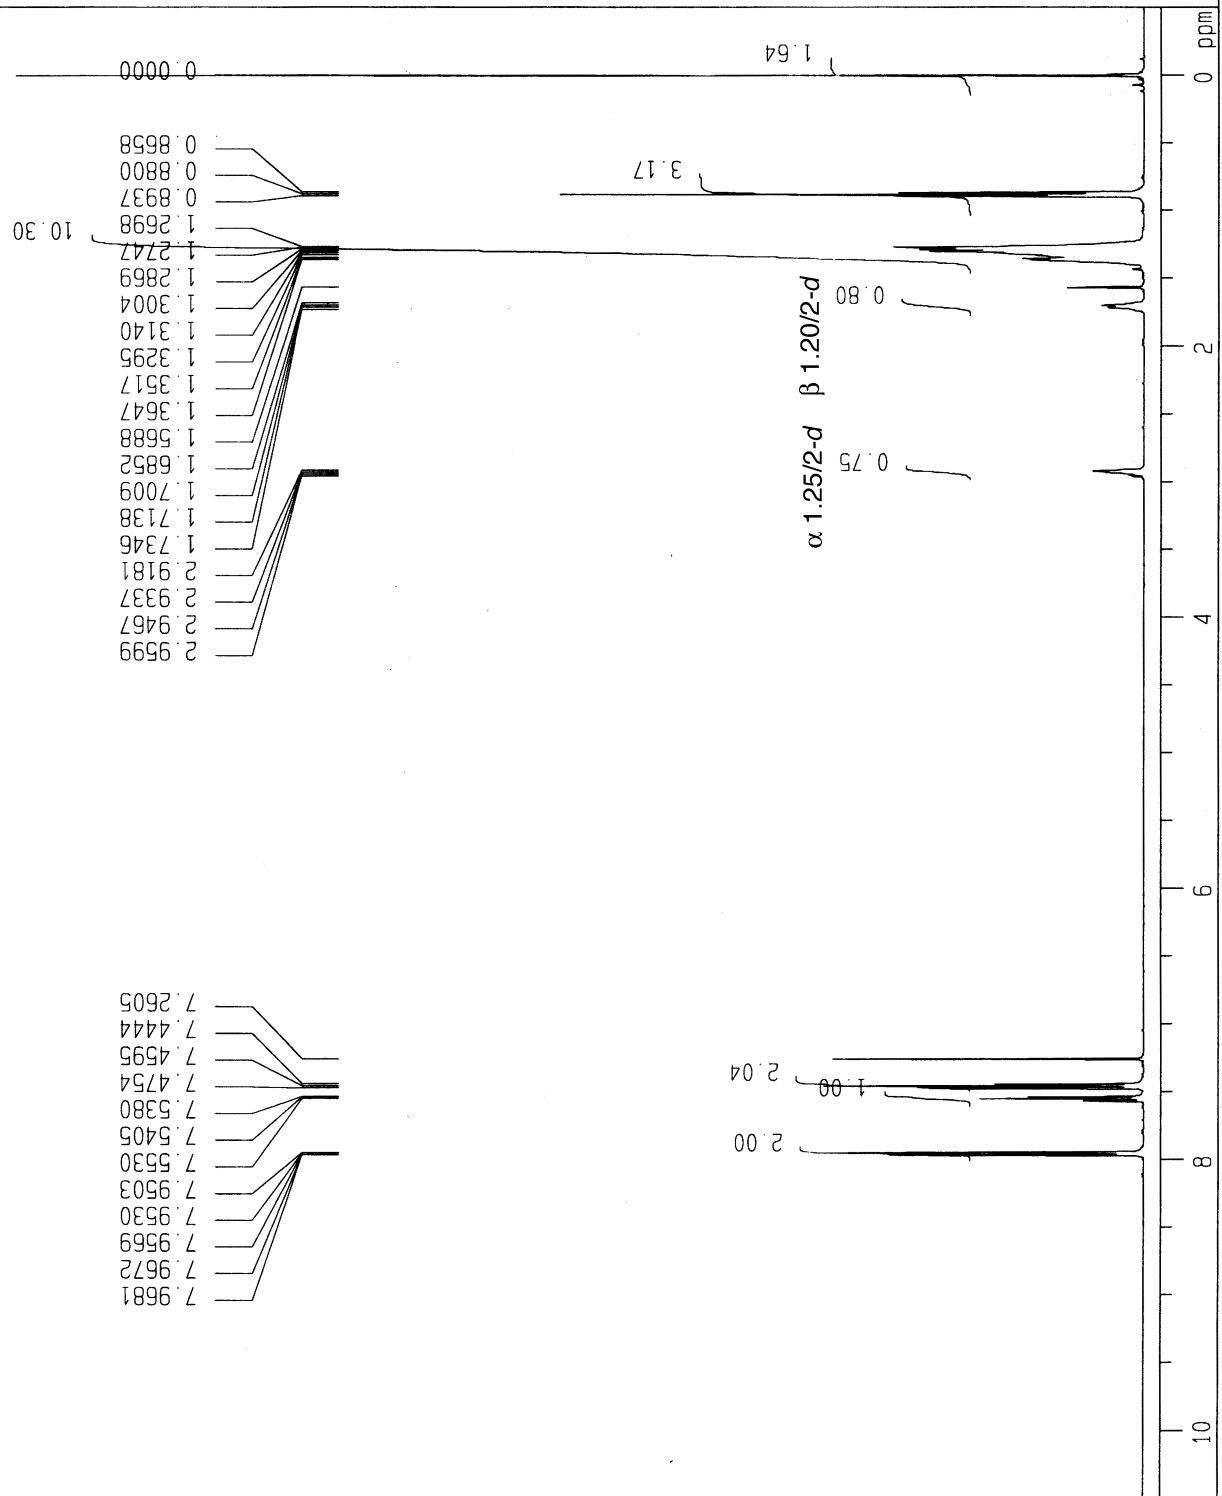

Date : Thu May 25 21:01:04 2006

FileName : LoadingFID.nmdata  
 Comment : 16060\_c  
 SliceHistory : non  
 EXMODE :

POINT 65536 points  
 SAMPO 65536 points  
 FREQU 8000.0 Hz  
 FILTR 4000 Hz  
 DELAY 50.0 usec  
 DEAT 72.3 usec  
 INTVL 125.0 usec  
 TIMES 16 times  
 DUMMY 0 times  
 PD 1.0000 sec  
 ACQTM 8192.0000 msec  
 PREDL 0.01000 msec  
 INIWT 1000.0000 msec  
 RESOL 0.12 Hz  
 PW1 5.50 usec  
 OBNUC 1H  
 OBFRQ 499.10 MHz  
 OBSET 128885.00 Hz  
 RGAIN 24  
 SCANS 16 times  
 SLVNT CDCL3  
 SPINNING 24 Hz  
 TEMP 24.1 C

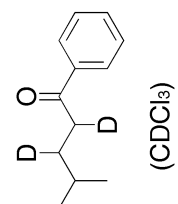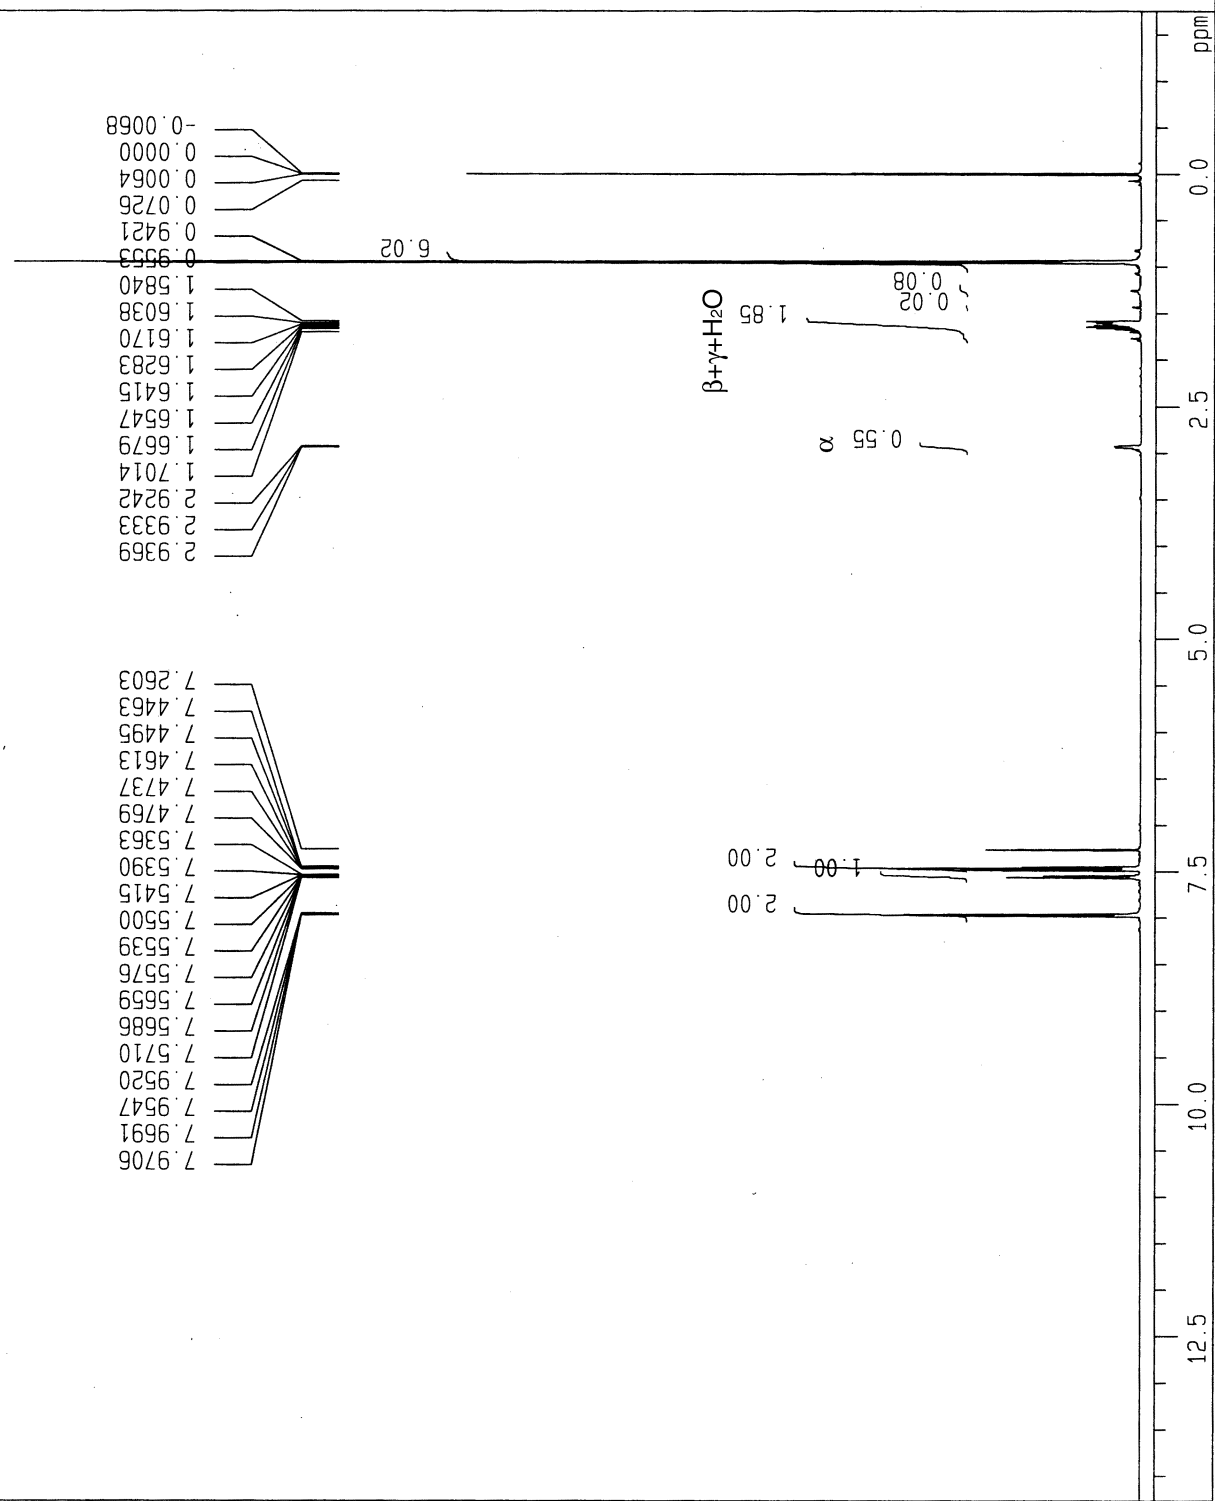

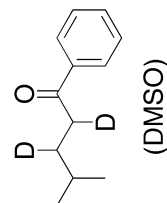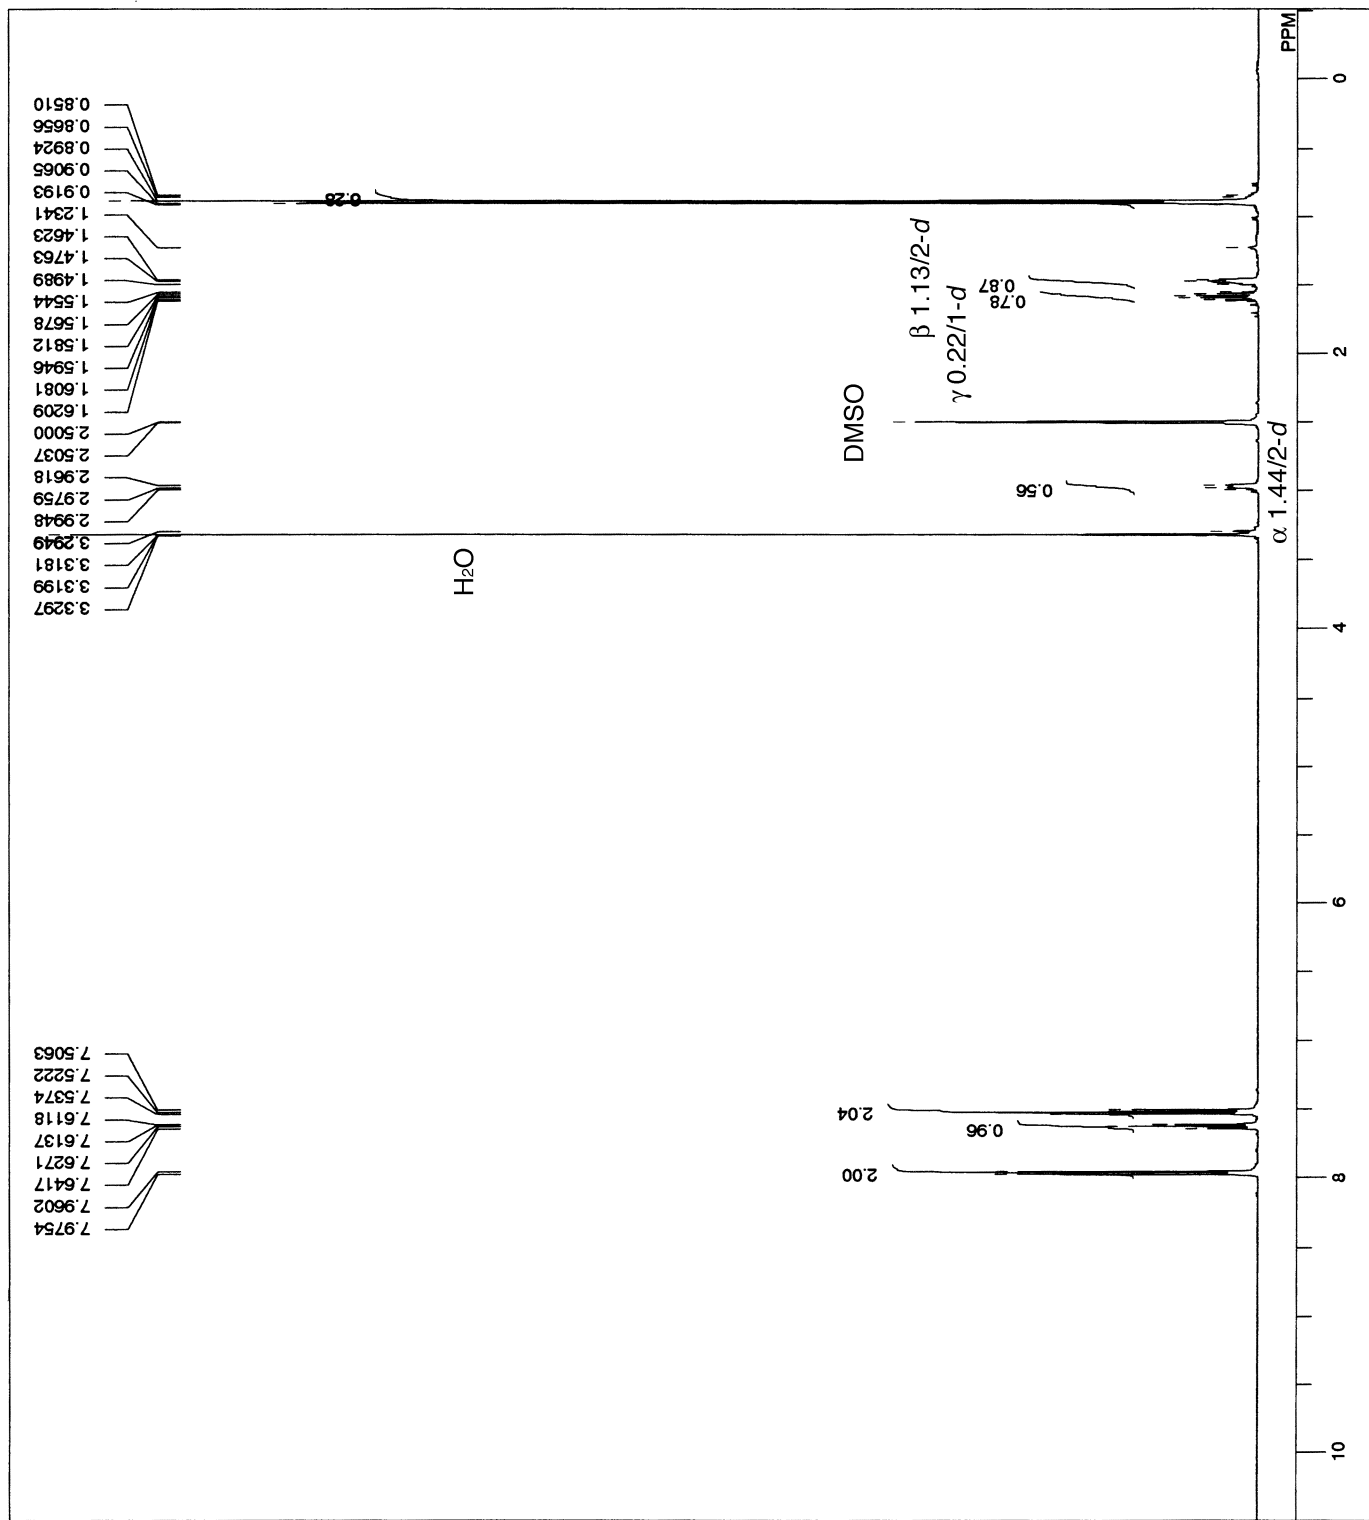

MENUF 1H  
 OBNUC 1H  
 OFR 499.10 MHz  
 OBSET 0.00 KHz  
 OBFIN 128250.00 Hz  
 PW1 6.10 usec  
 DEADT 57.00 usec  
 PREDL 10.00000 msec  
 IWT 0.5000 msec  
 POINT 32768  
 SPO 16  
 TIMES 0  
 DUMMY 9980.04 Hz  
 FREQU 5000 Hz  
 FLT 40.00 usec  
 DELAY 3.2894 sec  
 ACQTM 3.7170 sec  
 PD 16  
 ADBIT 24  
 RGAIN 0.12 Hz  
 BF 0.00  
 T1 0.00  
 T2 90.00  
 T3 100.00  
 T4 non  
 EXMOD single pulse nondecoupling & nonpresaturation  
 EXPCM 1H  
 IRNUC 499.10 MHz  
 IFR 0.00 KHz  
 IRSET 128250.00 Hz  
 IRFIN 50 usec  
 IRRPW 511  
 IRATN DEFAULT ALS  
 DFILE tfr5at  
 SF 0.00 KHz  
 LKSET 26571.0 Hz  
 LKFIN 180  
 LKLEV 17  
 LGAIN 352  
 LKPHS 835  
 LKSIG 13 Hz  
 CSPED  
 FILDC  
 FILDF

Date : Fri Jun 30 21:59:02 2006  
 FileName : .LoadingFID.nmdata  
 Comment : 16182\_b  
 SliceHistory : non  
 EXMODE :

POINT 65536 points  
 SAMPO 65536 points  
 FREQU 8000.0 Hz  
 FILTR 4000 Hz  
 DELAY 50.0 usec  
 DEATD 72.3 usec  
 INTVL 125.0 usec  
 TIMES 16 times  
 DUMMY 0 times  
 PD 1.0000 sec  
 ACQTM 8192.0000 msec  
 PREDL 0.01000 msec  
 INIWT 1000.0000 msec  
 RESOL 0.12 Hz  
 PW1 5.50 usec  
 OBNUC 1H  
 OBFRQ 499.10 MHz  
 OBSET 128885.00 Hz  
 RGAIN 26

SCANS : 16 times  
 SLVNT : CDCL3  
 SPINNING : 11 Hz  
 TEMP : 28.3 C

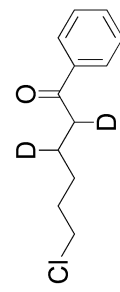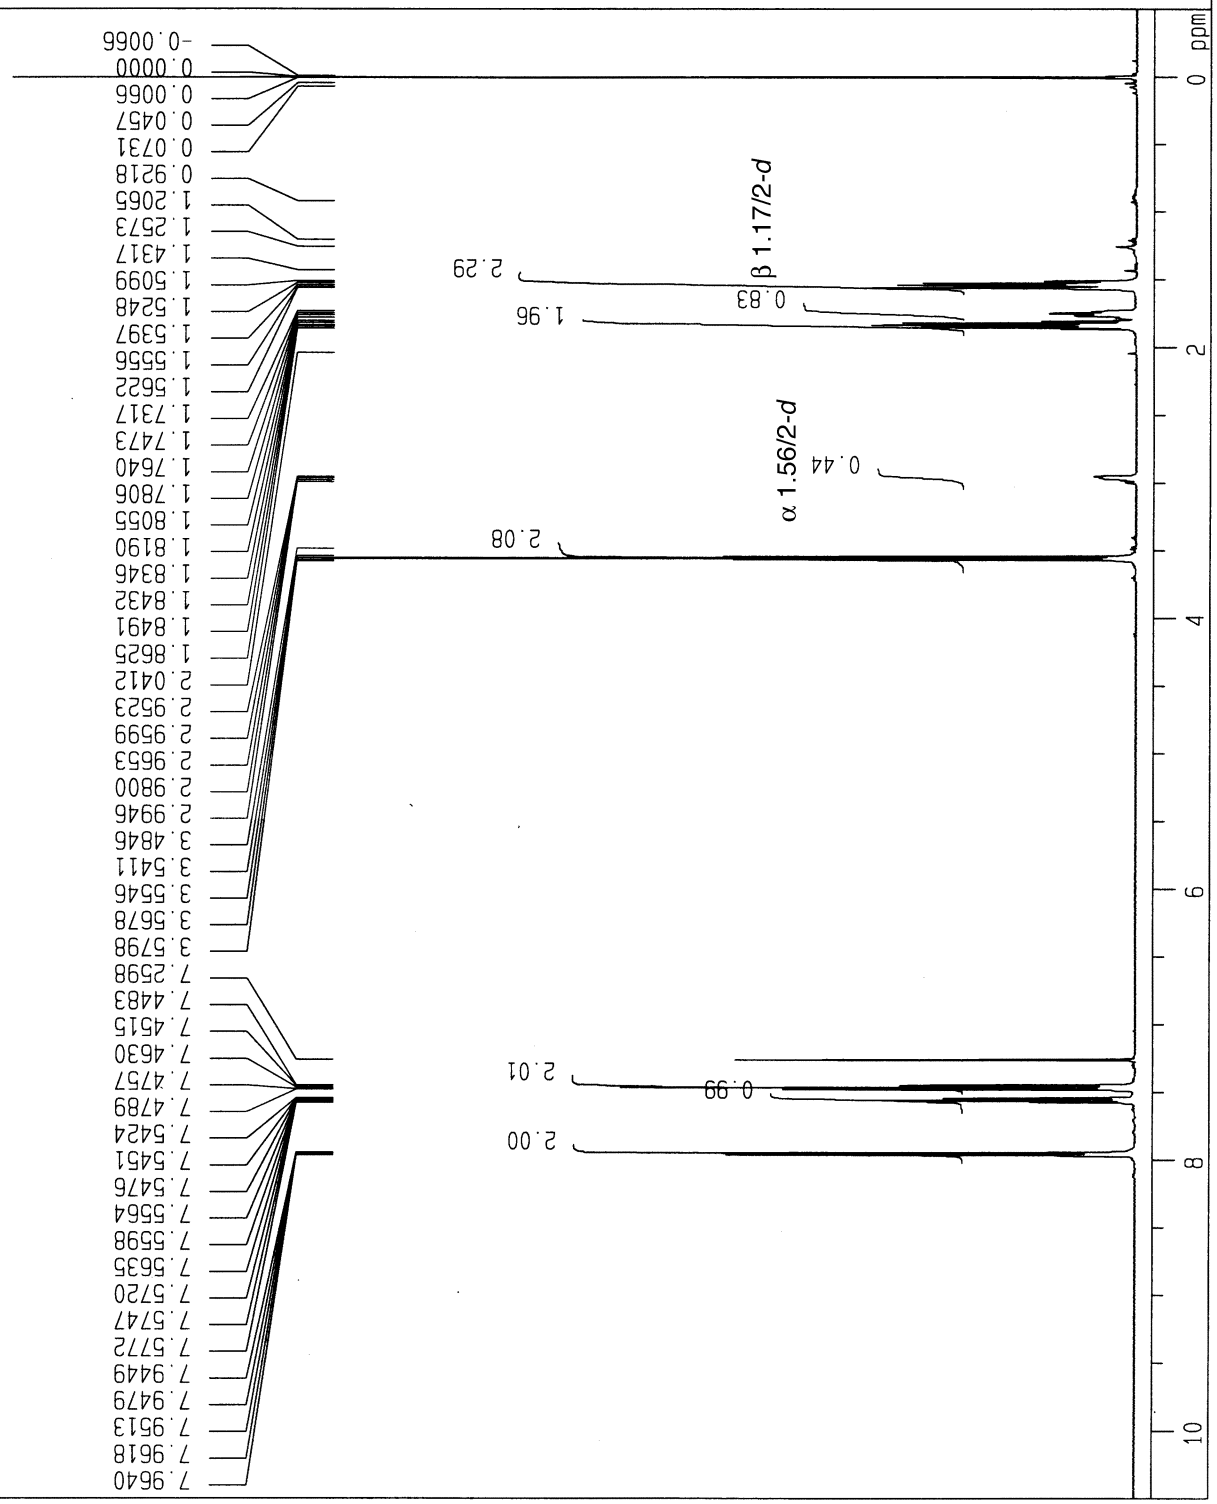

Date : Thu Feb 2 10:51:23 2006

FileName : .LoadingFID.mmdata  
 Comment : 15058\_c  
 SliceHistory :  
 EXMODE : non

POINT : 65536 points  
 SAMPO : 65536 points  
 FREOU : 8000.0 Hz  
 FILTR : 4000 Hz  
 DELAY : 50.0 usec  
 DEADT : 72.3 usec  
 INTVL : 125.0 usec  
 TIMES : 16 times  
 DUMMY : 0 times  
 PD : 1.0000 sec  
 ACQTM : 8192.0000 msec  
 PREDL : 0.01000 msec  
 INIWT : 1000.0000 msec  
 RESOL : 0.12 Hz  
 PW1 : 5.50 usec  
 OBNUC : <sup>1</sup>H  
 OBFRQ : 499.10 MHz  
 OBSET : 128885.00 Hz  
 RGAIN : 27  
 SCANS : 16 times  
 SLVNT : CDCL<sub>3</sub>  
 SPINNING : 13 Hz  
 TEMP : 23.8 C

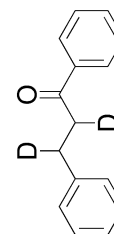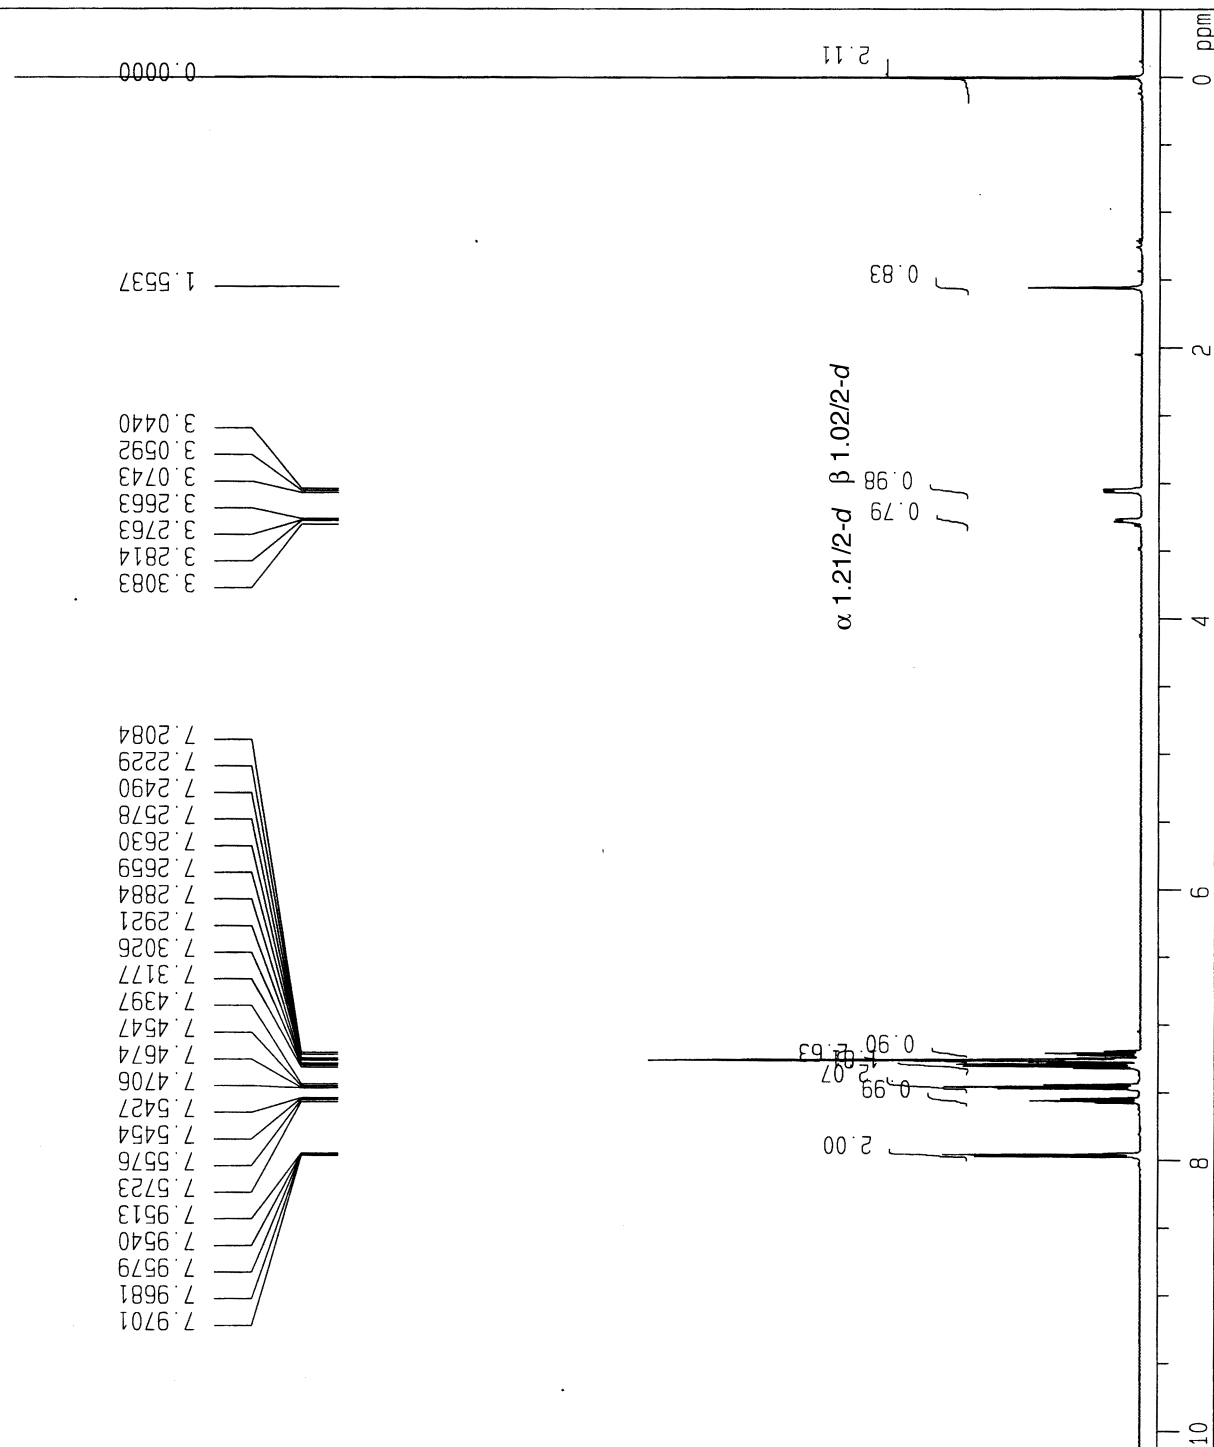



Date : Fri Apr 28 13:30:17 2006  
 FileName : .LoadingFID.nmdata  
 Comment : 16032\_e  
 SliceHistory : non  
 EXMODE : non

POINT : 65536 points  
 SAMPO : 65536 points  
 FREQU : 8000.0 Hz  
 FILTR : 4000 Hz  
 DELAY : 50.0 usec  
 DEADT : 72.3 usec  
 INTVL : 125.0 usec  
 TIMES : 16 times  
 DUMMY : 0 times  
 PD : 1.0000 sec  
 ACQTM : 8192.0000 msec  
 PREDL : 0.01000 msec  
 INIWT : 1000.0000 msec  
 RESOL : 0.12 Hz  
 PW1 : 5.50 usec  
 OBNUC : 1H  
 OBFRQ : 499.10 MHz  
 OBSET : 128885.00 Hz  
 RGAIN : 28

SCANS : 16 times  
 SLVNT : CDCL3  
 SPINNING : 13 Hz  
 TEMP : 24.5 C

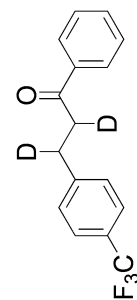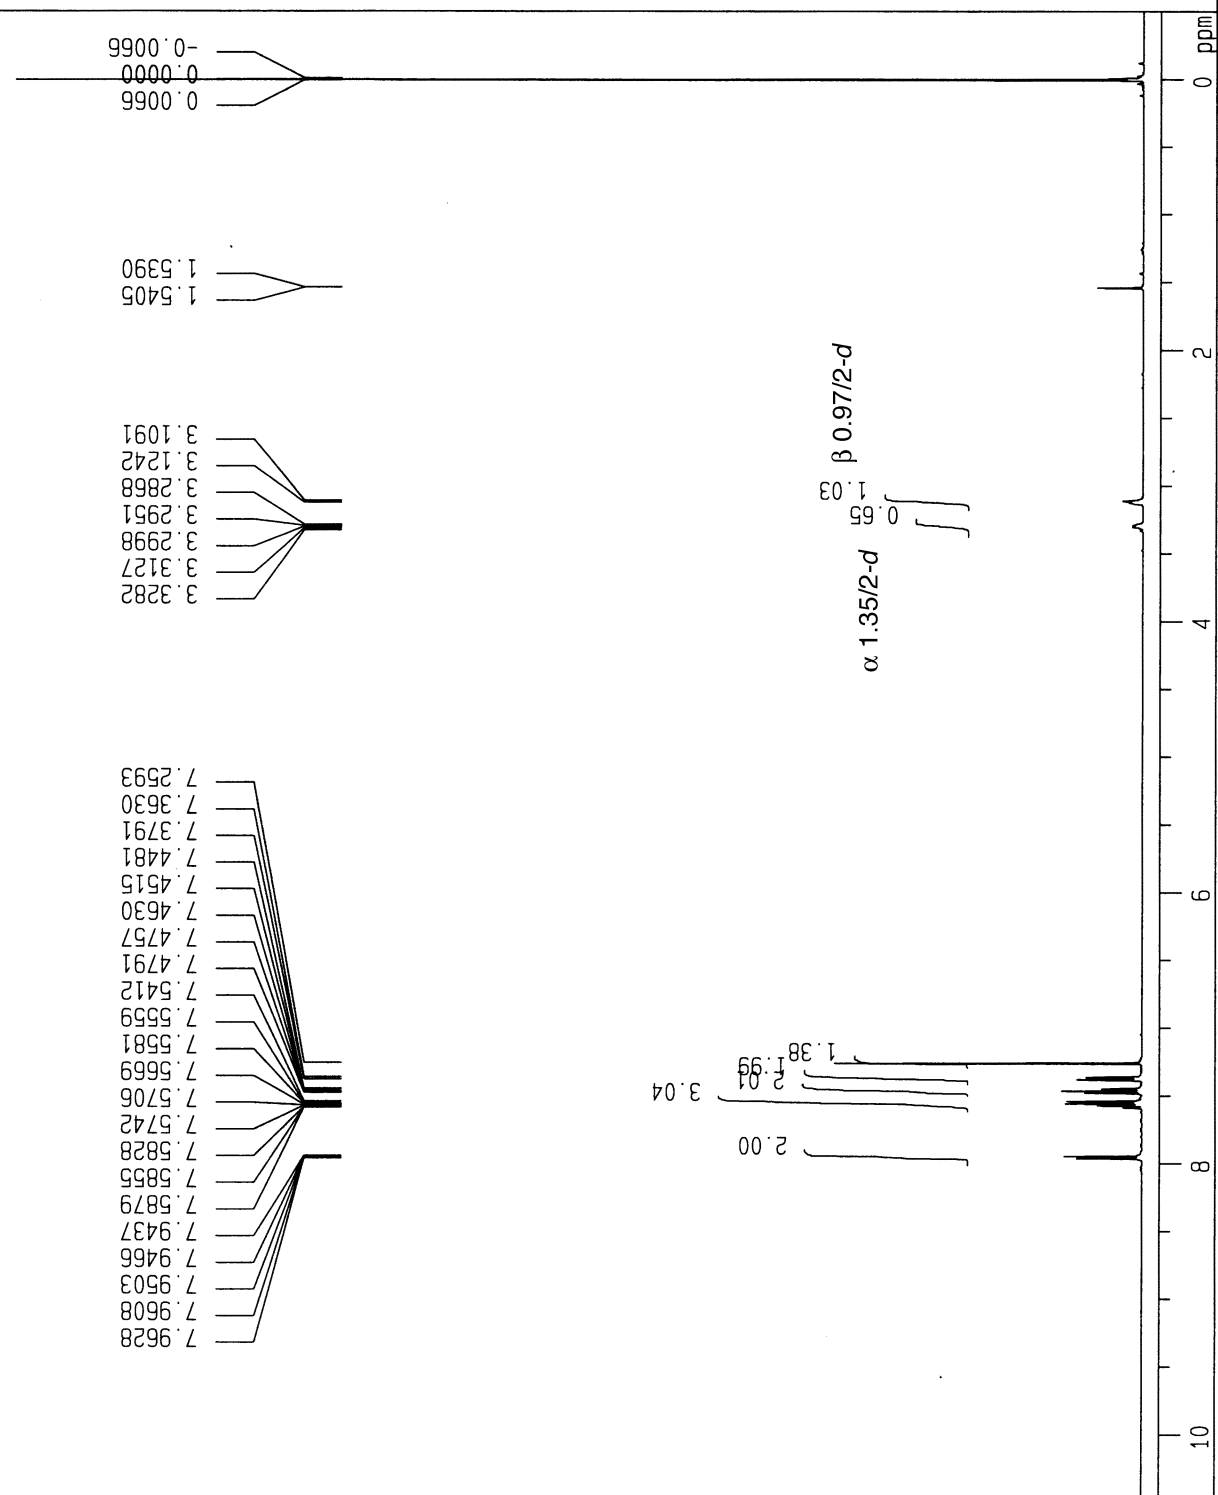

Date : Tue May 16 14:11:01 2006

FileName : .LoadingFID.nmdata  
 Comment : 16054\_c  
 SliceHistory :  
 EXMODE : non

POINT : 65536 points  
 SAMPO : 65536 points  
 FREQU : 8000.0 Hz  
 FILTR : 4000 Hz  
 DELAY : 50.0 usec  
 DEADT : 72.3 usec  
 INTVL : 125.0 usec  
 TIMES : 16 times  
 DUMMY : 0 times  
 PD : 1.0000 sec  
 ACQTM : 8192.0000 msec  
 PREDL : 0.01000 msec  
 INIWT : 1000.0000 msec  
 RESOL : 0.12 Hz  
 PW1 : 5.50 usec  
 OBNUC : <sup>1</sup>H  
 OBFRQ : 499.10 MHz  
 OBSET : 128885.00 Hz  
 RGAIN : 29  
 SCANS : 16 times  
 SLVNT : CDCL<sub>3</sub>  
 SPINNING : 11 Hz  
 TEMP : 22.4 C

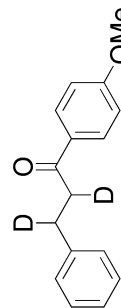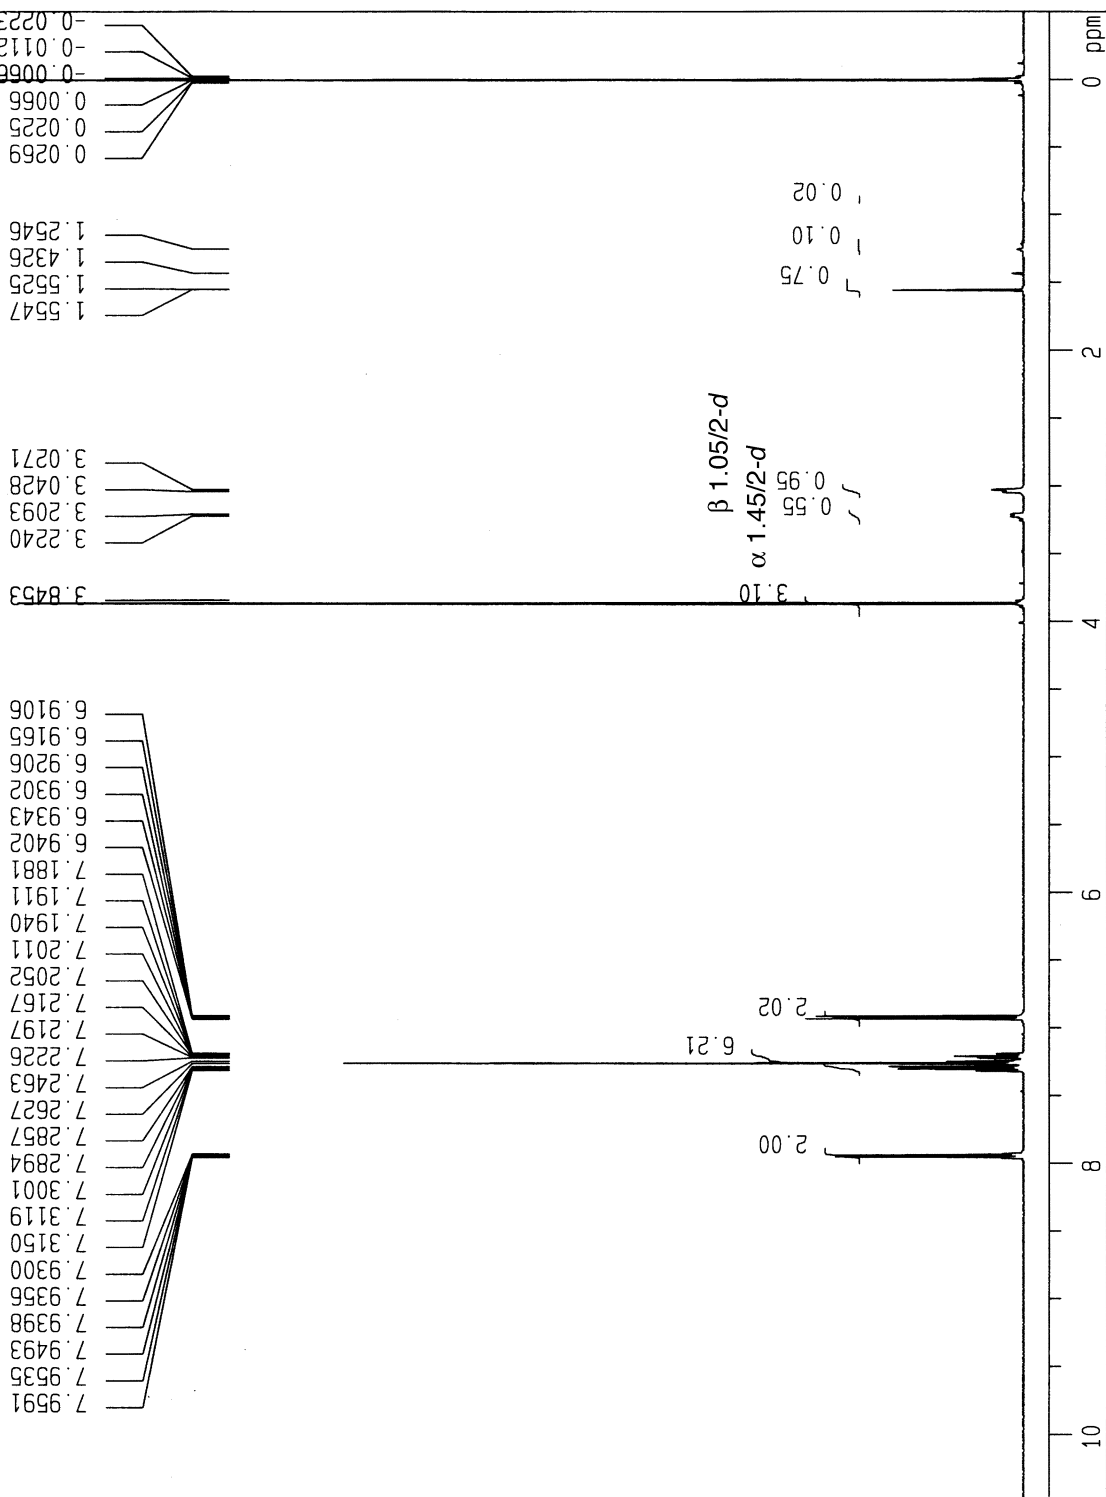



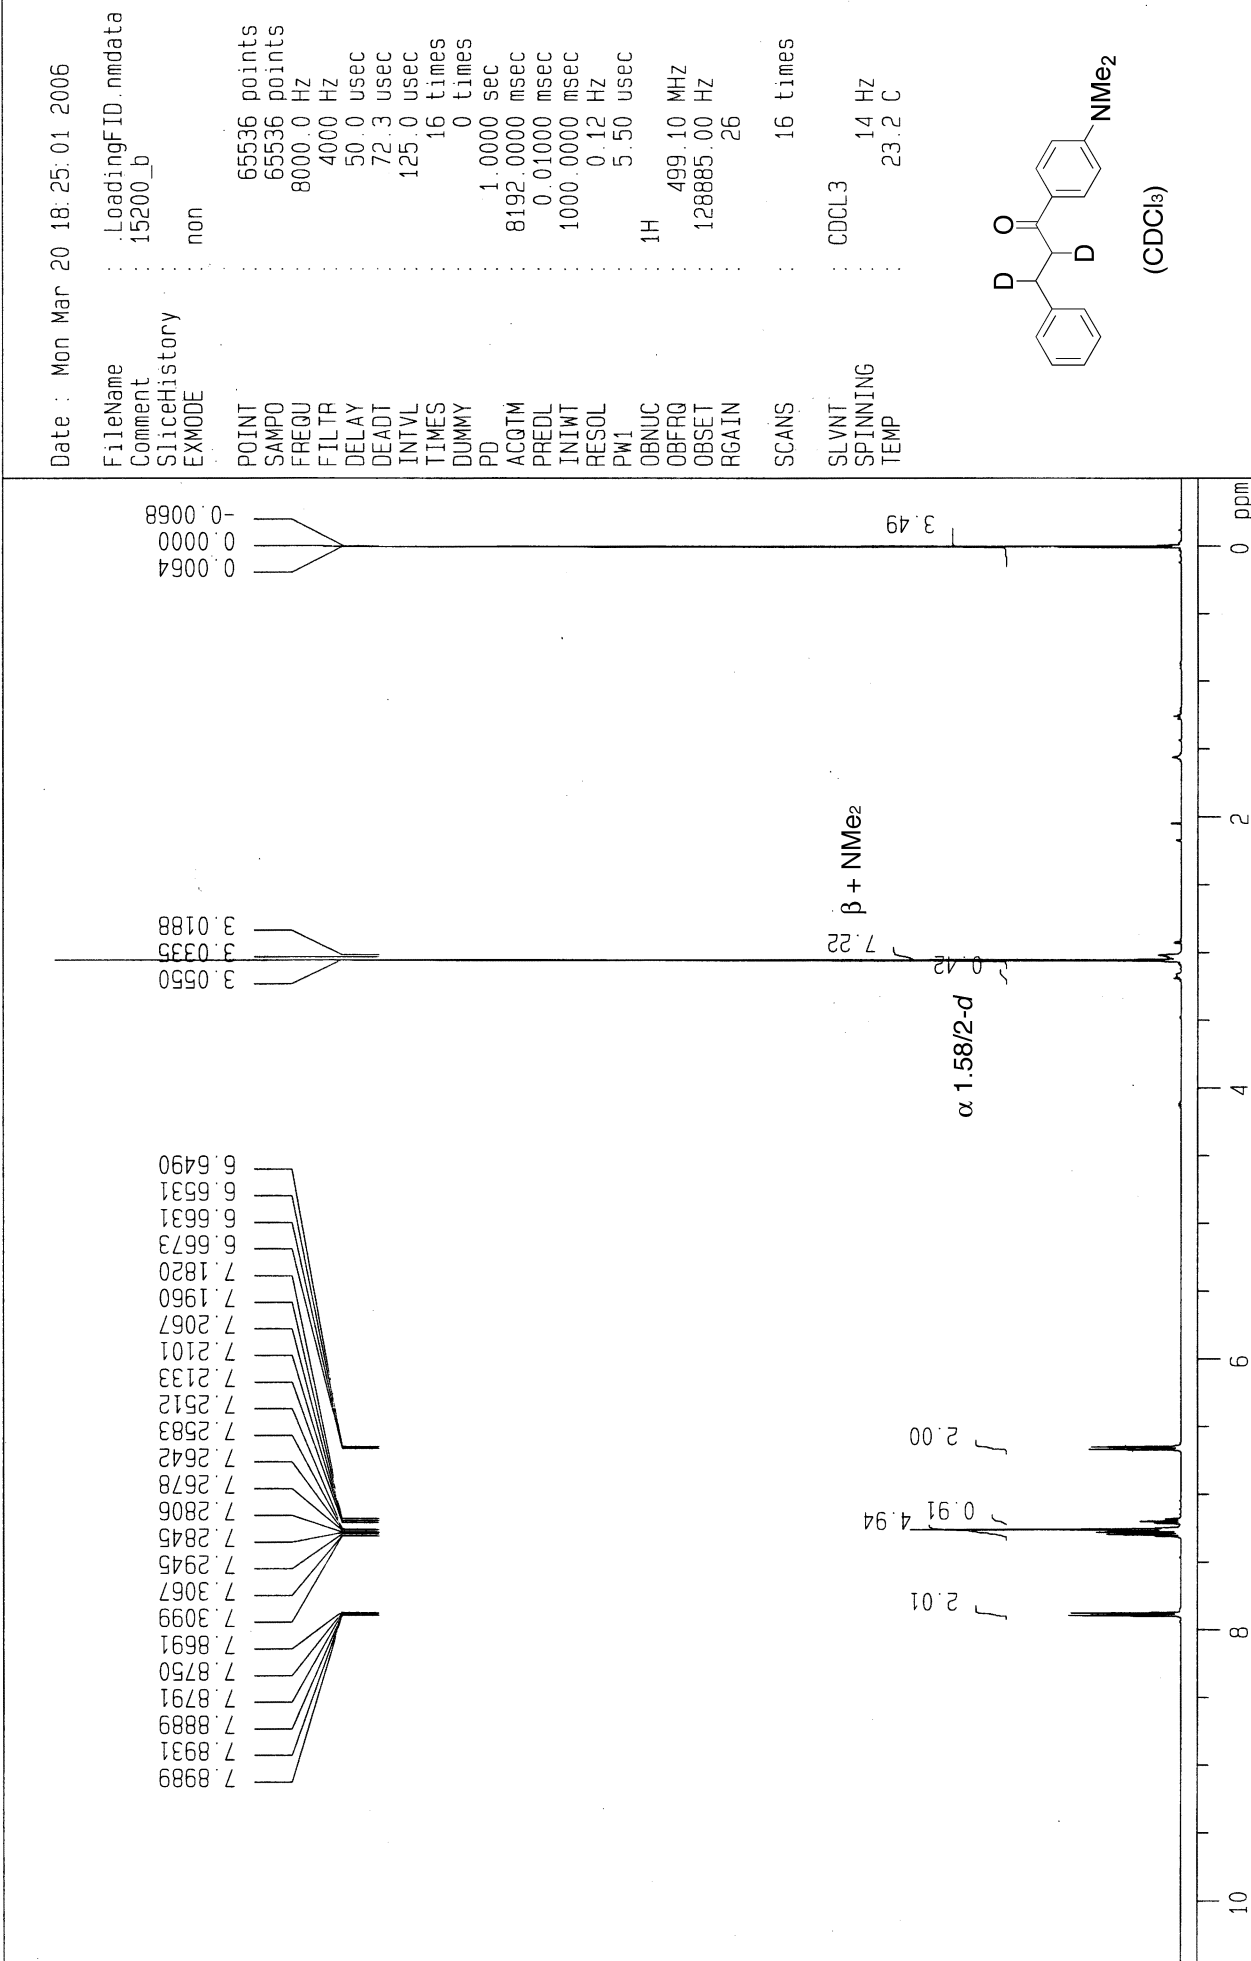

Date : Thu Mar 23 17:50:44 2006

FileName : LoadingFID\_nmdata  
 Comment : 15200\_b\_DMSO2  
 SliceHistory : non  
 EXMODE :

POINT 65536 points  
 SAMPO 65536 points  
 FREQU 8000.0 Hz  
 FILTR 4000 Hz  
 DELAY 50.0 usec  
 DEADT 72.3 usec  
 INTVL 125.0 usec  
 TIMES 16 times  
 DUMMY 0 times  
 PD 1.0000 sec  
 ACQTM 8192.0000 msec  
 PREDL 0.01000 msec  
 INIWT 1000.0000 msec  
 RESOL 0.12 Hz  
 PW1 5.50 usec  
 OBNUC 1H  
 OBFRQ 499.10 MHz  
 OBSET 128885.00 Hz  
 RGAIN 24

SCANS : 16 times  
 SLVNT : DMSO  
 SPINNING : 12 Hz  
 TEMP : 24.3 C

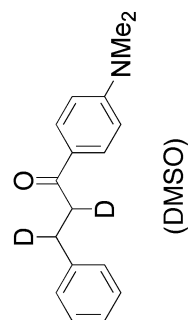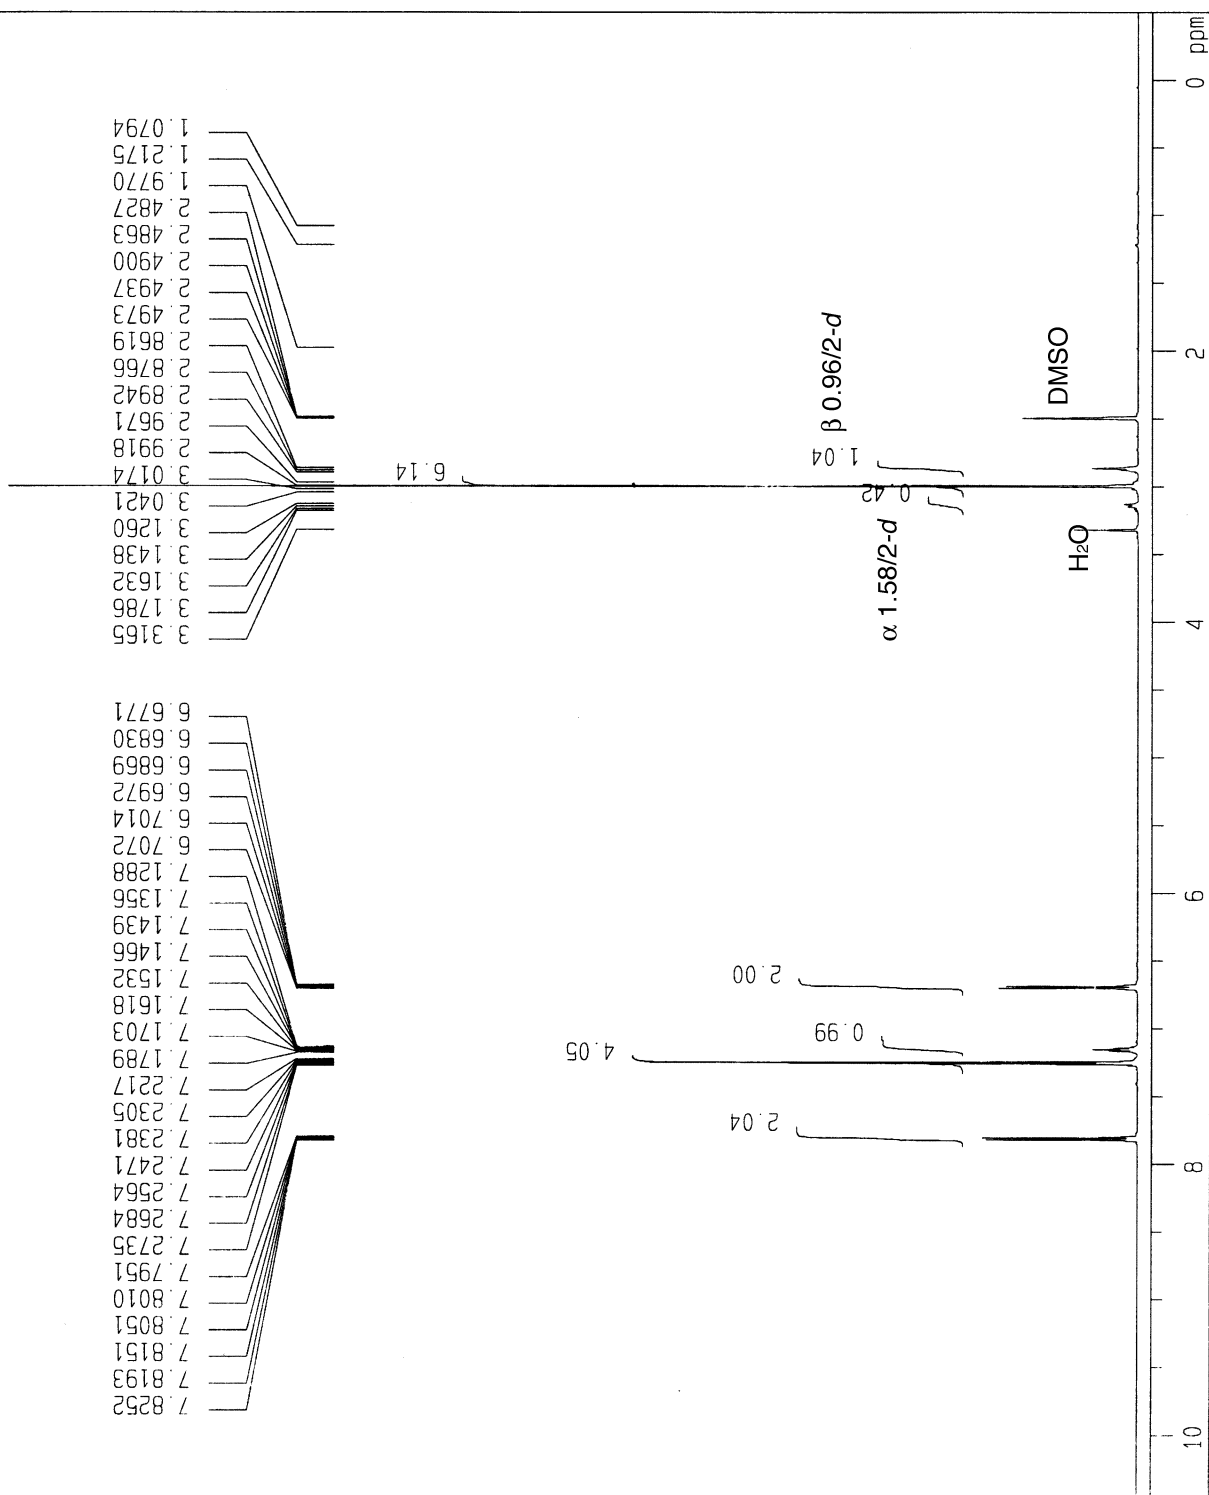

Date : Fri Apr 28 09:48:56 2006

FileName : .LoadingFID.nmdata  
 Comment : 16030\_d  
 SliceHistory : non  
 EXMODE :

POINT 65536 points  
 SAMP0 65536 points  
 FREQU 8000.0 Hz  
 FILTR 4000 Hz  
 DELAY 50.0 usec  
 DEADT 72.3 usec  
 INTVL 125.0 usec  
 TIMES 16 times  
 DUMMY 0 times  
 PD 1.0000 sec  
 ACQTM 8192.0000 msec  
 PREDL 0.01000 msec  
 INIWT 1000.0000 msec  
 RESOL 0.12 Hz  
 PW1 5.50 usec  
 OBNUC 1H  
 OBFRQ 499.10 MHz  
 OBSET 128885.00 Hz  
 RGAIN 25  
 SCANS 16 times

SLVNT : CDCL3  
 SPINNING 11 Hz  
 TEMP 24.4 C

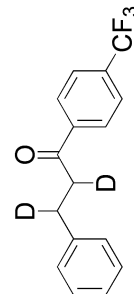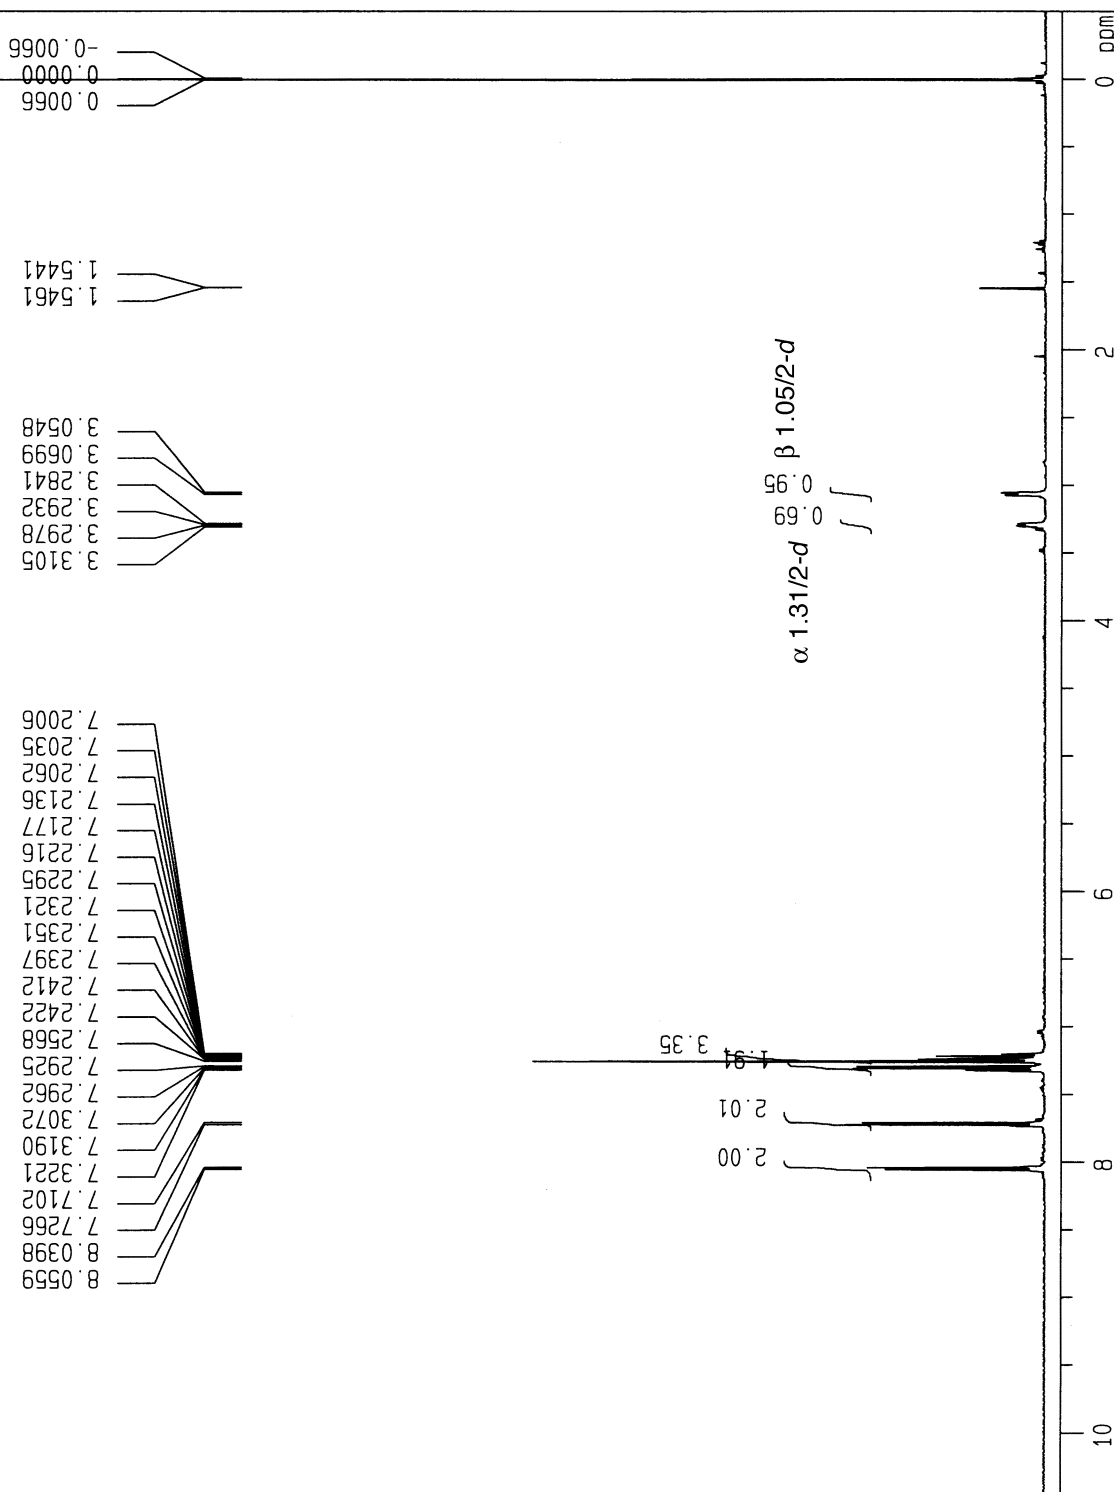

0 ppm  
2  
4  
6  
8  
10

1H  
 499.10 MHz  
 0.00 KHz  
 128250.00 Hz  
 6.10 usec  
 57.00 usec  
 10.00000 msec  
 0.5000 msec  
 32768  
 32768  
 16  
 16  
 0  
 9980.04 Hz  
 5000 Hz  
 40.00 usec  
 3.2834 sec  
 3.7170 sec  
 16  
 24  
 0.12 Hz  
 0.00  
 0.00  
 0.00  
 90.00  
 100.00  
 non  
 single pulse nondecoupling  
 1H  
 499.10 MHz  
 0.00 KHz  
 128250.00 Hz  
 50 usec  
 511  
 DEFAULT.ALS  
 th5at  
 0.00 KHz  
 26934.0 Hz  
 200  
 20  
 347  
 1278  
 14 Hz

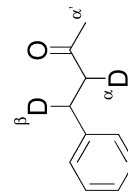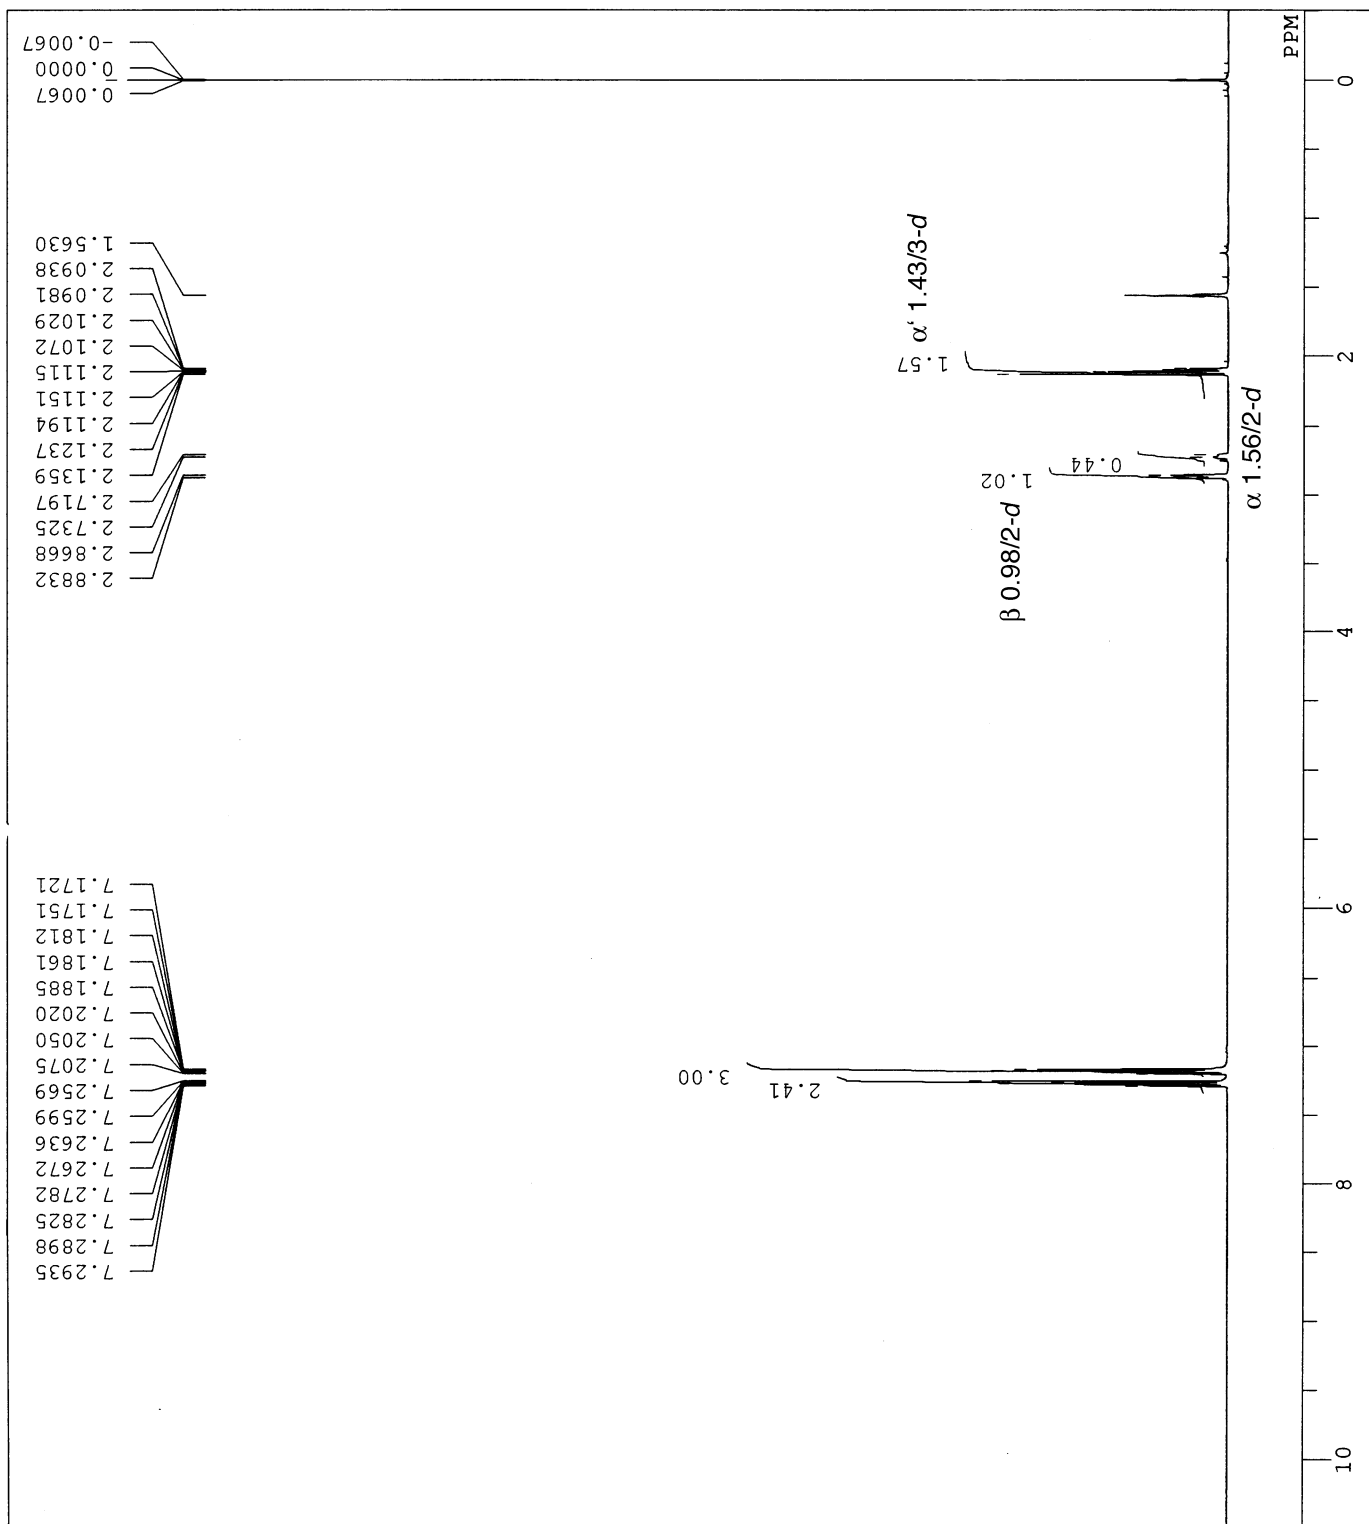

|       |                            |               |
|-------|----------------------------|---------------|
| MENUF | 1H                         |               |
| OBNUC | 1H                         |               |
| OFR   |                            | 499.10 MHz    |
| OBSET |                            | 0.00 KHz      |
| OBFIN |                            | 128250.00 Hz  |
| PWL   |                            | 6.10 usec     |
| DEADT |                            | 57.00 usec    |
| PREDL |                            | 10.00000 msec |
| IWT   |                            | 0.5000 msec   |
| POINT |                            | 32768         |
| SPO   |                            | 32768         |
| TIMES |                            | 16            |
| DUMMY |                            | 0             |
| FREQU |                            | 9980.04 Hz    |
| FLT   |                            | 5000 Hz       |
| DELAY |                            | 40.00 usec    |
| ACQTM |                            | 3.2834 sec    |
| PD    |                            | 3.7170 sec    |
| ADBIT |                            | 16            |
| RGAIN |                            | 21            |
| BF    |                            | 0.12 Hz       |
| T1    |                            | 0.00          |
| T2    |                            | 0.00          |
| T3    |                            | 90.00         |
| T4    |                            | 100.00        |
| EXMOD | non                        |               |
| EXPCM | single pulse nondecoupling |               |
| IRNUC | 1H                         |               |
| IFR   |                            | 499.10 MHz    |
| IRSET |                            | 0.00 KHz      |
| IRFIN |                            | 128250.00 Hz  |
| IRRPW |                            | 50 usec       |
| IRATN |                            | 511           |
| DFILE | _DEFAULT.ALS               |               |
| SF    | th5at                      |               |
| LKSET |                            | 0.00 KHz      |
| LKFIN |                            | 26934.0 Hz    |
| LKLFV |                            | 200           |
| LGAIN |                            | 20            |
| LKPHS |                            | 352           |
| LKSIG |                            | 772           |
| CSPED |                            | 13 Hz         |
| FILDC |                            |               |
| FILDF |                            |               |

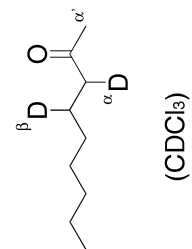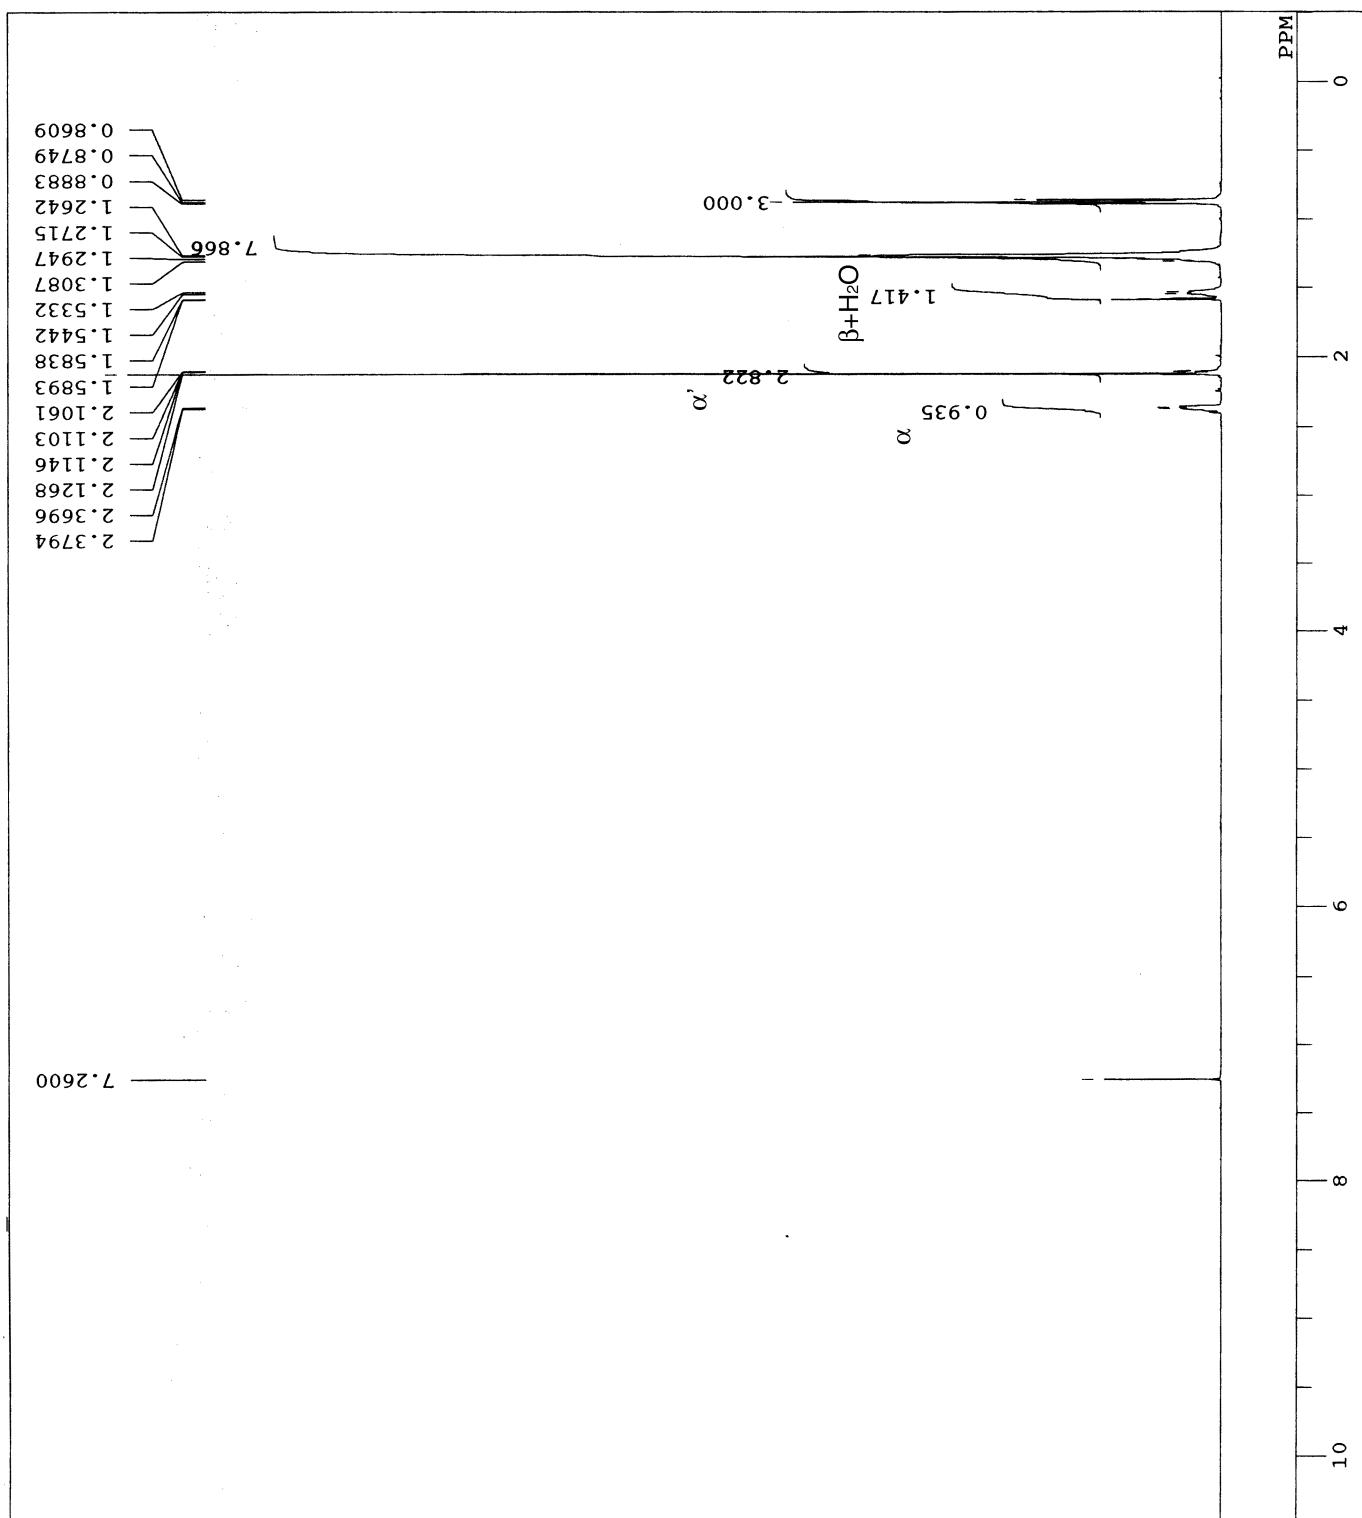

```

MENUF 1H
OBNUC 1H
OFR 499.10 MHz
OBSET 0.00 KHz
OBFIN 128250.00 Hz
PW1 6.10 usec
DEADT 57.00 usec
PREDL 10.00000 msec
IWT 0.5000 msec
POINT 32768
SPO 32768
TIMES 16
DUMMY 0
FREQU 9980.04 Hz
FLT 5000 Hz
DELAY 40.00 usec
ACQTM 3.2834 sec
PD 3.7170 sec
ADBIT 16
RGAIN 24
BF 0.12 Hz
T1 0.00
T2 0.00
T3 90.00
T4 100.00
EXMOD non
EXPCM single pulse nondecoupling
IRNUC 1H
IFR 499.10 MHz
IRSET 0.00 KHz
IRFIN 128250.00 Hz
IRRPW 50 usec
IRATN 511
DFILE _DEFAULT.ALS
SF th5at
LKSET 0.00 KHz
LKFIN 26571.0 Hz
LKLEV 180
LGAIN 16
LKPHS 352
LKSIG 703
CSPED 12 Hz
FILDC
FILDF
    
```

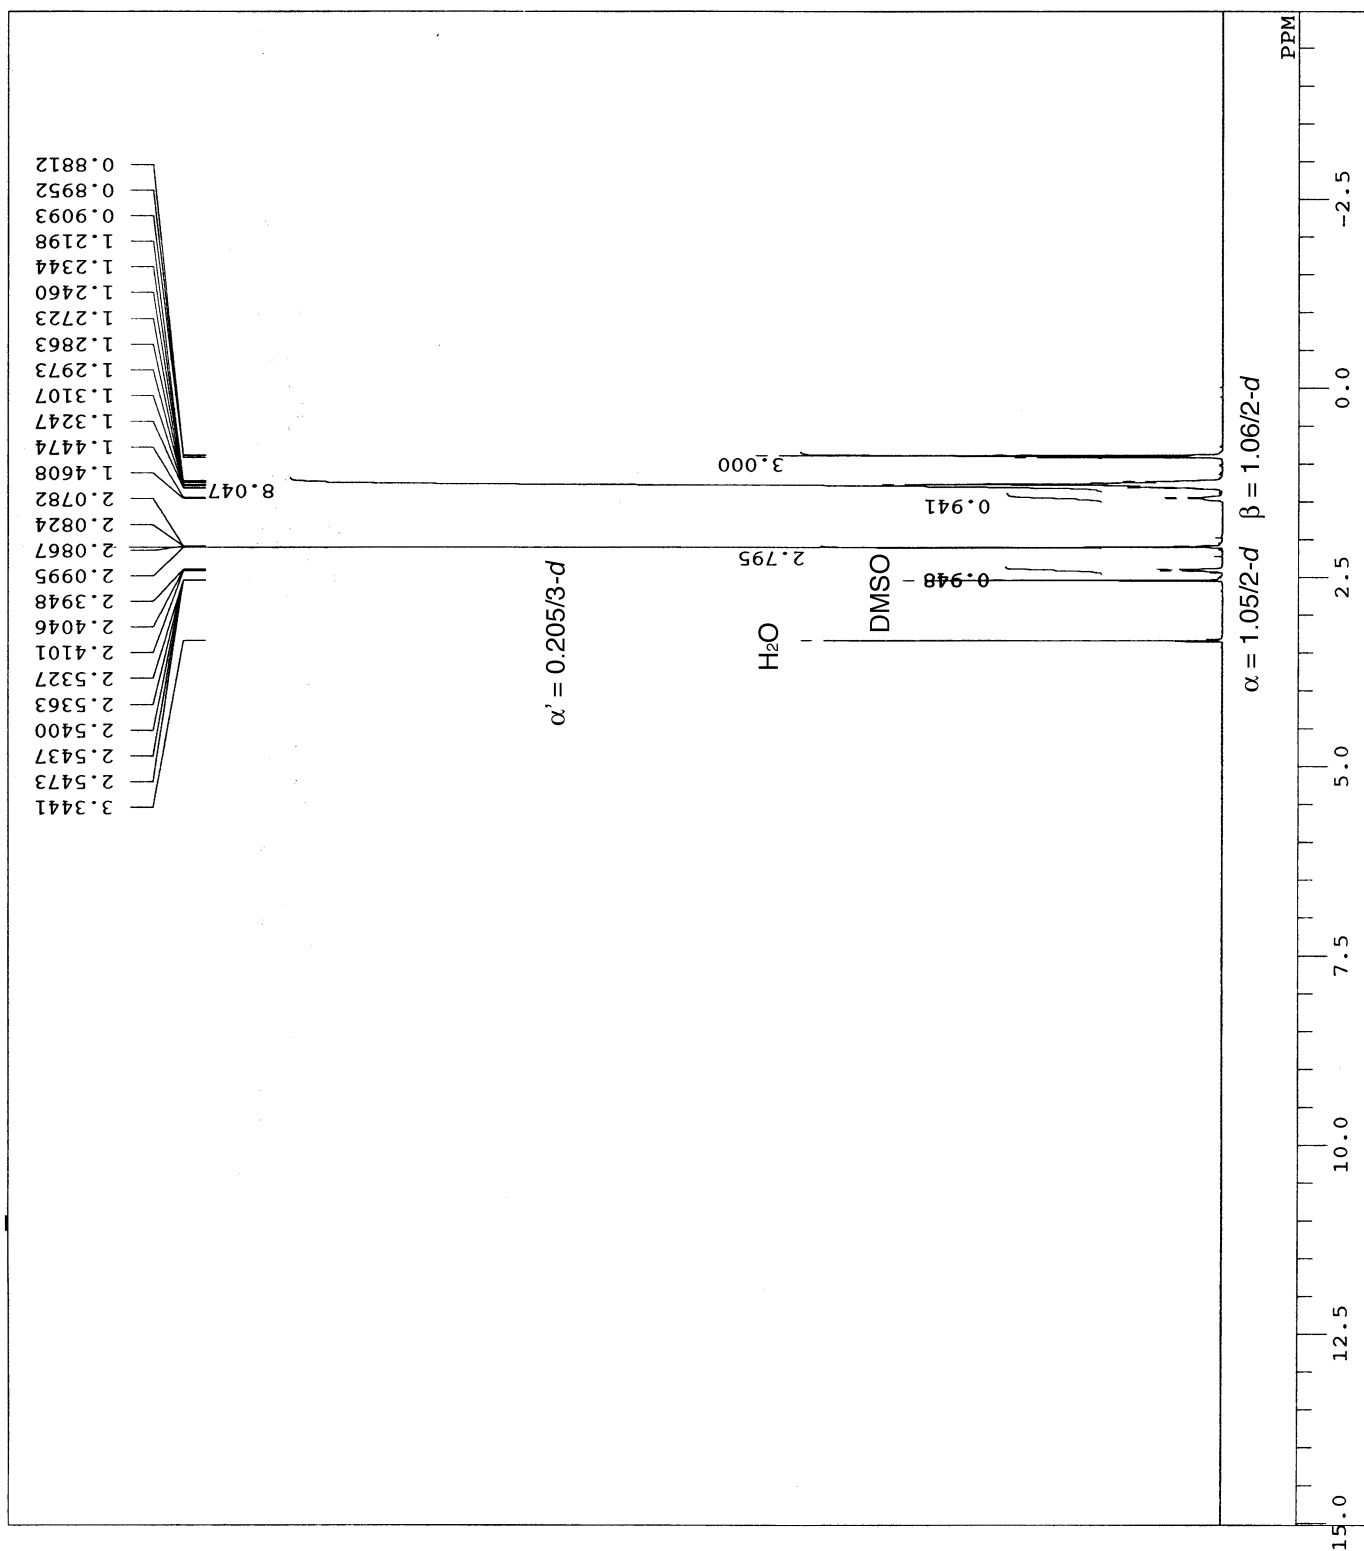

1H  
 1H  
 499.10 MHz  
 0.00 KHz  
 128250.00 Hz  
 6.10 usec  
 57.00 usec  
 10.00000 msec  
 0.5000 msec  
 32768  
 32768  
 16  
 0  
 9980.04 Hz  
 5000 Hz  
 40.00 usec  
 3.2834 sec  
 3.7170 sec  
 16  
 25  
 0.12 Hz  
 0.00  
 0.00  
 90.00  
 100.00  
 non  
 single pulse nondecoupling  
 1H  
 499.10 MHz  
 0.00 KHz  
 128250.00 Hz  
 50 usec  
 511  
 DEFAULT.ALS  
 th5at  
 0.00 KHz  
 26934.0 Hz  
 200  
 20  
 347  
 727  
 13 Hz

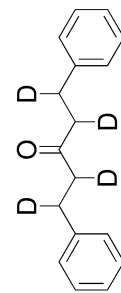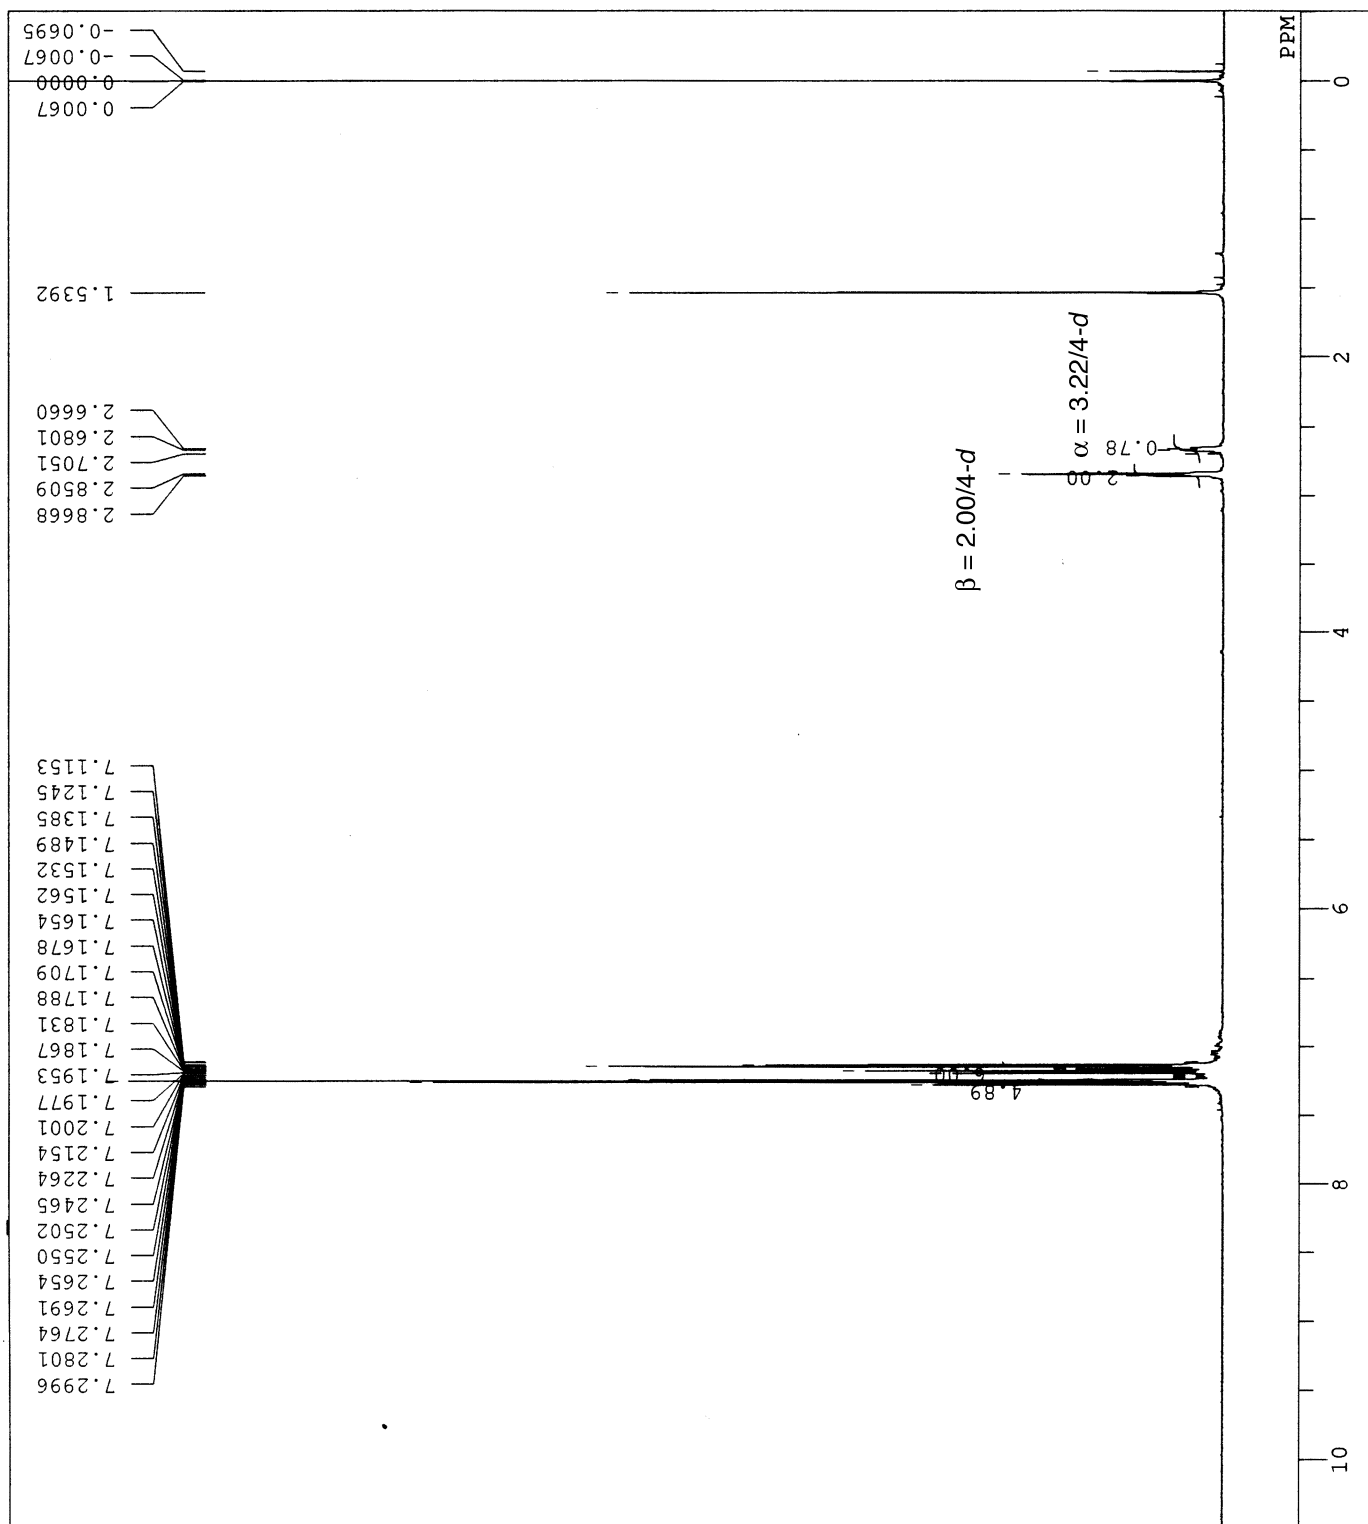

Supplement: b618107d-2.pdf [file b618107d-2.pdf]
